# Supplementary material for: Convergent behavior of extended stalk regions from staphylococcal surface proteins with widely divergent sequence patterns
Source: PubMed Central journal article supplement — bioRxiv. 2023 Jan 7:2023.01.06.523059. Preprint. [Version 1] doi: 10.1101/2023.01.06.523059 (PMC9881980; doi:10.1101/2023.01.06.523059), 2023-01-07
Supplement: media-1.pdf [file media-1.pdf]

## Supplementary Data

### Convergent behavior of extended stalk regions from staphylococcal surface proteins with widely divergent sequence patterns

Alexander E. Yarawsky<sup>1#</sup>, Andrea L. Ori<sup>1,2†</sup>, Lance R. English<sup>3‡</sup>, Steven T. Whitten<sup>3</sup>, and Andrew B. Herr<sup>1,4,5</sup>

#### Affiliations:

<sup>1</sup> Division of Immunobiology, Cincinnati Children's Hospital Medical Center, Cincinnati, OH 45229, USA

<sup>2</sup> Medical Sciences Baccalaureate Program, University of Cincinnati, Cincinnati, OH 45267, USA

<sup>3</sup> Department of Chemistry and Biochemistry, Texas State University, San Marcos, TX 78666, USA

<sup>4</sup> Division of Infectious Diseases, Cincinnati Children's Hospital Medical Center, Cincinnati, OH 45229, USA

<sup>5</sup> Department of Pediatrics, University of Cincinnati College of Medicine, Cincinnati, OH 45229, USA

# Current affiliation: BioAnalysis, LLC, Philadelphia, PA 19134, USA

† Current affiliation: Graduate Program in Molecular Biophysics, Johns Hopkins University, Baltimore, MD 21218, USA

‡ Current affiliation: Department of Physical Sciences, Temple College, Temple, TX 76502, USA

**Correspondence** to Andrew B. Herr: Division of Immunobiology, Cincinnati Children's Hospital Medical Center, 3333 Burnet Avenue, Cincinnati, OH 45229, USA. [andrew.herr@cchmc.org](mailto:andrew.herr@cchmc.org)

**Supplementary data files present in this document include:**

1. **Supplementary Tables S1—S3**

## Supplementary Tables

**Table S1. Sequence-based parameters of IDP dataset.** The dataset is reproduced from Tomasso, et al. [1]. Parameters listed here were calculated using a program provided by Steven Whitten, based on Tomasso, et al. [1]. Shaded IDPs are from the current study. IDPs are sorted by descending  $f_{\text{PPII}}$ .

| IDP                   | N   | Net charge | $R_h$ (coil) | $R_h$ (PPII) | $R_h$ (PPII charge) | $R_h^a$ (experimental) | $f_{\text{PPII}}$ |
|-----------------------|-----|------------|--------------|--------------|---------------------|------------------------|-------------------|
| Aap-PGR               | 135 | -7         | 25.64        | 38.50        | 37.84               | 37.06                  | 0.5350            |
| p53(1-93)             | 93  | -15        | 21.24        | 29.51        | 30.56               | 32.4                   | 0.4890            |
| SasG-PGR              | 69  | +7         | 18.27        | 24.56        | 24.43               | 24.8                   | 0.4761            |
| p53(1-93) ALA-        | 93  | -15        | 21.24        | 28.66        | 29.70               | 30.4                   | 0.4581            |
| p53 TAD               | 73  | -14        | 18.80        | 24.79        | 25.84               | 23.8                   | 0.4500            |
| Aap-Arpts             | 189 | -29        | 30.38        | 41.26        | 44.06               | 40.8                   | 0.4190            |
| Securin               | 202 | -1         | 31.41        | 42.57        | 40.45               | 39.7                   | 0.4130            |
| PDE- $\gamma$         | 87  | +4         | 20.54        | 26.51        | 25.70               | 24.8                   | 0.4122            |
| Cad136                | 136 | +9         | 25.73        | 33.77        | 33.45               | 28.1                   | 0.4025            |
| HIF1- $\alpha$ -403   | 202 | -29        | 31.41        | 42.13        | 44.86               | 44.3                   | 0.4024            |
| Tau-K45               | 198 | +19        | 31.10        | 41.52        | 42.53               | 45                     | 0.3988            |
| HIF1- $\alpha$ -530   | 170 | -10        | 28.80        | 37.81        | 37.44               | 38.3                   | 0.3899            |
| Fos-AD                | 168 | -16        | 28.62        | 37.17        | 37.84               | 35                     | 0.3783            |
| ShB-C                 | 146 | -4         | 26.67        | 34.32        | 33.06               | 32.9                   | 0.3764            |
| $\alpha$ -synuclein   | 140 | -9         | 26.11        | 33.47        | 33.12               | 28.2                   | 0.3744            |
| Mlph(147-403)         | 260 | -28        | 35.68        | 47.00        | 49.24               | 49                     | 0.3703            |
| CFTR-R-region         | 189 | -5         | 30.38        | 39.18        | 37.82               | 32                     | 0.3644            |
| p57-ID                | 73  | -6         | 18.80        | 23.14        | 22.80               | 24                     | 0.3636            |
| prothymosin- $\alpha$ | 110 | -43        | 23.12        | 29.02        | 34.77               | 33.7                   | 0.3633            |
| LJIDP1                | 94  | +4         | 21.36        | 26.46        | 25.59               | 24.52                  | 0.3565            |
| Mlph(147-240)         | 97  | -15        | 21.70        | 26.85        | 27.86               | 28                     | 0.3528            |
| SNAP25                | 206 | -14        | 31.73        | 40.60        | 40.70               | 39.7                   | 0.3513            |
| Hdm2-ABD              | 97  | -29        | 21.70        | 26.47        | 29.91               | 25.7                   | 0.3345            |
| SdrC-SD               | 62  | -16        | 17.31        | 20.64        | 22.15               | 21.1                   | 0.3294            |
| Vmw65                 | 89  | -19        | 20.78        | 25.13        | 26.90               | 28                     | 0.3278            |
| p53(1-93) PRO-        | 93  | -15        | 21.24        | 24.93        | 25.97               | 27.4                   | 0.2832            |
| SD-30mer              | 30  | -15        | 12.01        | 13.45        | 15.16               | ND <sup>b</sup>        | 0.2700            |

<sup>a</sup> Reported in Å. Values in gray cells were as determined in this manuscript or [2]; values in white cells are reproduced from [1].

<sup>b</sup> ND, not determined.

**Table S2. The sequence of IDPs used in PPII and  $R_h$  predictions.** IDP sequences (other than those from the current study - shaded) are from Tomasso, et al. supplementary material [1].

| IDP                   | Sequence                                                                                                                                                                                                                                                                            |
|-----------------------|-------------------------------------------------------------------------------------------------------------------------------------------------------------------------------------------------------------------------------------------------------------------------------------|
| p53(1-93)             | MEEPQSDPSVEPPLSQETFSDLWKLLPENNVLSPLPSQAMDDLMLS<br>PDDIEQWFTEDPGPDEAPRMPEAAPPVAPAPAAPTPAAPAPAPSW<br>PL                                                                                                                                                                               |
| p53(1-93) ALA-        | MEEPQSDPSVEPPLSQETFSDLWKLLPENNVLSPLPSQGMDLMLS<br>PDDIEQWFTEDPGPDEGPRMPEGGPPVGGPGGGPTPGGPGGPS<br>WPL                                                                                                                                                                                 |
| p53(1-93) PRO-        | MEEGQSDGSVEGGLSQETFSDLWKLLGENNVLSGLGSQAMDDLML<br>SGDDIEQWFTEDGGGDEAGRMGEAAGGVAGAGAAGTGAAGAGAG<br>SWGL                                                                                                                                                                               |
| p53 TAD               | MEEPQSDPSVEPPLSQETFSDLWKLLPENNVLSPLPSQAMDDLMLS<br>PDDIEQWFTEDPGPDEAPRMPEAAPRV                                                                                                                                                                                                       |
| Vmw65                 | GSAGHTRRLSTAPPTDVSLGDELHLDGEDVAMAHADALDDFDLDM<br>LGDGDSPPGPGFTPHDSAPYGALDMADFEFEQMFTDALGIDEYGG                                                                                                                                                                                      |
| Hdm2-ABD              | ERSSSESTGTSPNPDLDAGVSEHSGDWLDQDSVSDQFSVEFEVE<br>SLDSEDYSLSEEGQELSDDEDDEVYQVTVYQAGESDTSFEEDPEIS<br>LADYWK                                                                                                                                                                            |
| prothymosin- $\alpha$ | MSDAAVDTSSSEITTKDLKEKKEVVEEAENGRDAPANGNANEENGEQ<br>EADNEVDEEEEEEGEEEEEEEEEGDGEEEDGDEDEEAESATGKRAA<br>EDDEDDVDTKKQKTDEDD                                                                                                                                                             |
| HIF1- $\alpha$ -403   | PAAGDTIISLDFGSNDTETDDQQLEEVPLYNDVMLPSPNEKLQINLA<br>MSPLPTAETPKPLRSSADPALNQEVALKLEPNPESLELSFTMPQIQD<br>QTPSPSDGSTRQSSPEPNPSEYCFYVDSDMVNEFKLELVEKLF<br>AE DTEAKNPFSTQDLDLEMLAPYIPMDDDFQLRSFDQLSPLESSSAS<br>PESASPQSTVTVFQ                                                             |
| Fos-AD                | GSHMSVASLDLTGGLPEVATPESEEAFTLPLLNDPEPKPSVEPVKSI<br>SSMELKTEPFDDFLFPASSRPSGSETARVPMDLSGSFYAADWEP<br>LHSGSLGMGPMATELEPLCTPVVTCTPSCTAYTSSVFVTYPEADSFP<br>SCAAHRKGGSSNEPSSDSLSSPTLLAL                                                                                                   |
| Mlph(147-240)         | RLQGGGGSEPSLEEGNGDSEQTDEDGDLDEARDQPLNSKKKKRL<br>LSFRDVFEEEDSDHLVQPCSQTLGLSSVPESAHSLSLSGEPYSED<br>TTSLEP                                                                                                                                                                             |
| Tau-K45               | MSSPGSPGTPGSRRTPLPTPTREPKKVAVVRTPPKSPSSAKSR<br>LQTAPVPMPLKKNVSKIGSTENLKHQPGGGKVQIINKKLDLSNVQS<br>KCGSKDNIKHVPGGGSVQIVYKPVDLKVTSTKCGSLGNIHHKPGGG<br>QVEVKSEKLDKDRVQSKIGSLDNITHVPGGGNKKIETHKLTRENA<br>KAKTDHGAEIVY                                                                    |
| Mlph(147-403)         | RLQGGGGSEPSLEEGNGDSEQTDEDGDLDEARDQPLNSKKKKRL<br>LSFRDVFEEEDSDHLVQPCSQTLGLSSVPESAHSLSLSGEPYSED<br>TTSLEPEGLEETGARALGCRPSPEVQPCSPSPGEDAHAELDSPAA<br>SCKSAFGTTAMPGTDDVRGKHLPSQYLADVDTSDEDSIQGPRAASQ<br>HSKRRARTVPETQILELNKRMSAVEHLLVHLENTVLPESAQEPVET<br>HPSADTEEETLRRRLEELTSNIGSSTSSE |
| p57-ID                | VRTSACRSLFGPVDHEELSRELQARLAELNAEDQNRWDYDFQQDM<br>PLRGPGRQLQWTEVSDSDSVPAFYRETVQV                                                                                                                                                                                                     |
| PDE- $\gamma$         | MNLEPPKAEIRSATRVMGGPVTPRKGPPKFKQRQTRQFKSKPPKK<br>GVQGGFGDDIPGMEGLGTDITVICPWEAFNHLELHELAQYGII                                                                                                                                                                                        |





| <i>Pro-rich LCRs</i>                  |                                                                                                                                                                                                                                             |
|---------------------------------------|---------------------------------------------------------------------------------------------------------------------------------------------------------------------------------------------------------------------------------------------|
| Aap <sup>a</sup><br>( <i>S. epi</i> ) | PTKAEPGKPAEPGKPAEPGKPAEPGTPAEPGKPAEPGTPAEPGKPAEPGKPAEP<br>GKPAEPGKPAEPGTPAEPGTPAEPGKPAEPGTPAEPGKPAEPGTPAEPGKPAES<br>GKPVPEGTPAQSGAPEQPNRSMHSTDNKNQ                                                                                          |
| SasG                                  | PKDPKGPENPEKPSRPTHPSGPVNPNNPGLSKDRAKPNGPVHSMKNDKVKKS<br>KIAKESVANQEKKRAE                                                                                                                                                                    |
| CNA                                   | PEKPNKPIYPEKPKDKTTPNPKPDHSNKVRPTPPDEPSKVDKVDQPKDNKTKPENP<br>LKE                                                                                                                                                                             |
| FnbpA                                 | PIIVPPTPPTPEVPSEPETPTPPTPEVPSEPETPTPPTPEVPSEPETPTPPTPEVPA<br>EPGKPVPPAKEEPKKPSKPVEQGKVVTPVIEINEKVKAVAPTCKKPKQSKKSE                                                                                                                          |
| FnbpB                                 | PPIVPPTPPTPEVPSEPETPTPPTPEVPSEPETPTPPTPEVPTEPGKPIPPAKEEPK<br>KPSKPVEQGKVVTPVIEINEKVKAVVPTKKAQSKKSE                                                                                                                                          |
| <i>Other LCRs</i>                     |                                                                                                                                                                                                                                             |
| SraP<br>(SasA)                        | MSGQSISDSTSTMSGSTSTSESNSMHPSDSMSMHHTHSTSTSRLSSEATTST<br>SESQSTLSATSEVTKHNGTPAQSEKR                                                                                                                                                          |
| FmtB<br>(SasB)                        | NNKATQNDGANASPATVSNGSNSANQDMLNVTNTDDHQAKTKSAQQGKVNKAK<br>QQAKT                                                                                                                                                                              |
| SasC                                  | DTAIGQIDQDRSNAQVDKTASLNLQTIHDLVDVHPIKPPDAEKTINDDLARVTALVQN<br>YRKVSDRNKADALKAITALKLQMDDEELKTARTNADVDAVLKRFNVALSDIEAVITEK<br>ENSLLRIDNIAQQTYAKFKAIATPEQLAKVKVLIDQYVADGNRMIDEDATLNDIKQH<br>TQFIVDEILAIKLP AEATKVSPKEIQPAPKVCTPIKKEETHESRKVEKE |

<sup>a</sup> The Aap sequence listed here is based on the consensus identification of the LCR region by the PlaToLoCo server [3], as for all other sequences in Table 5. This sequence differs slightly from the Aap construct used for experimental approaches (compare to Figure 1).

## References

1. Tomasso ME, Tarver MJ, Devarajan D, Whitten ST. Hydrodynamic Radii of Intrinsically Disordered Proteins Determined from Experimental Polyproline II Propensities. *PLoS computational biology*. 2016;12(1):e1004686. Epub 2016/01/05. doi: 10.1371/journal.pcbi.1004686. PubMed PMID: 26727467
2. Yarawsky AE, English LR, Whitten ST, Herr AB. The Proline/Glycine-Rich Region of the Biofilm Adhesion Protein Aap Forms an Extended Stalk that Resists Compaction. *Journal of molecular biology*. 2017;429(2):261-79. Epub 2016/11/29. doi: 10.1016/j.jmb.2016.11.017. PubMed PMID: 27890783
3. Jarrot P, Ziemska-Legiecka J, Dobson L, Merski M, Mier P, Andrade-Navarro MA, et al. PlaToLoCo: the first web meta-server for visualization and annotation of low complexity regions in proteins. *Nucleic Acids Research*. 2020;48(W1):W77-W84. doi: 10.1093/nar/gkaa339
